# Supplementary material for: Early life peripheral lipopolysaccharide challenge reprograms catecholaminergic neurons
Source: PubMed Central journal article supplement (PMC5223129; doi:10.1038/srep40475), 2017-01-10
Supplement: srep40475-s1.pdf [file srep40475-s1.pdf]

## Supplementary information

### Manuscript title

Early life peripheral lipopolysaccharide challenge reprograms catecholaminergic neurons

### Author list

Lin Kooi Ong, Erin A. Fuller, Luba Sominsky, Deborah M. Hodgson Peter R. Dunkley, Phillip W. Dickson

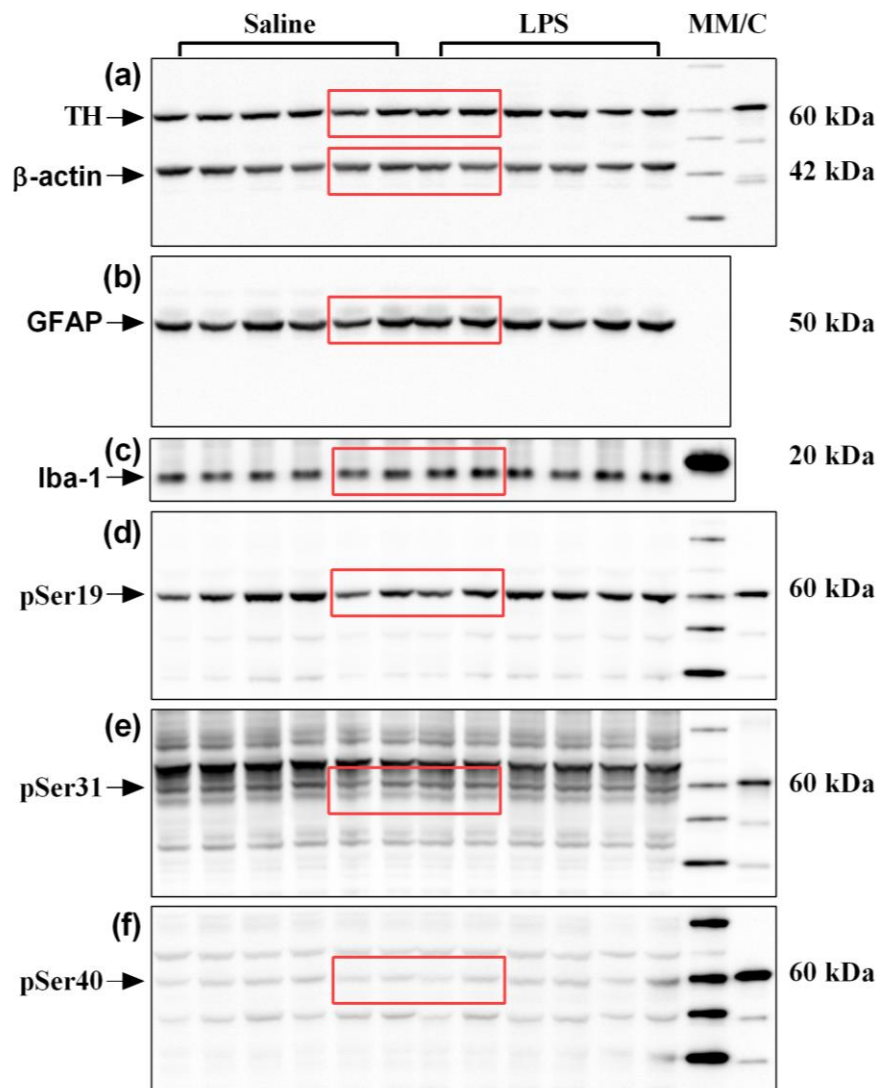

**Sup Fig. 1:** Full-length SN immunoblots probed with total-/phospho-TH, GFAP, Iba-1 or  $\beta$ -actin antibodies. MM, MagicMark™ XP Western Protein Standard; C, recombinant TH protein (specifically phosphorylated at Ser19, Ser31 or Ser40); red box, cropped images represented in Fig. 1 and Fig. 2.

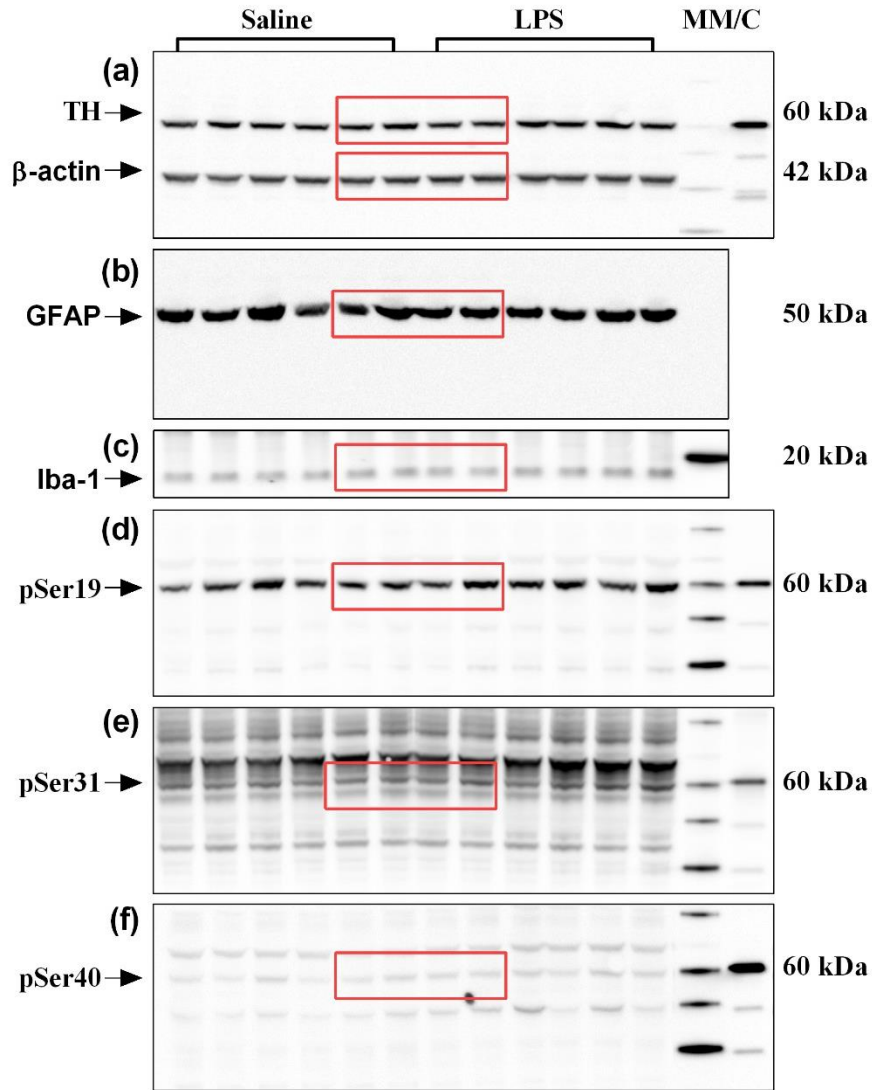

**Sup Fig. 2:** Full-length VTA immunoblots probed with total-/phospho-TH, GFAP, Iba-1 or β-actin antibodies. MM, MagicMark™ XP Western Protein Standard; C, recombinant TH protein (specifically phosphorylated at Ser19, Ser31 or Ser40); red box, cropped images represented in Fig. 1 and Fig. 2.

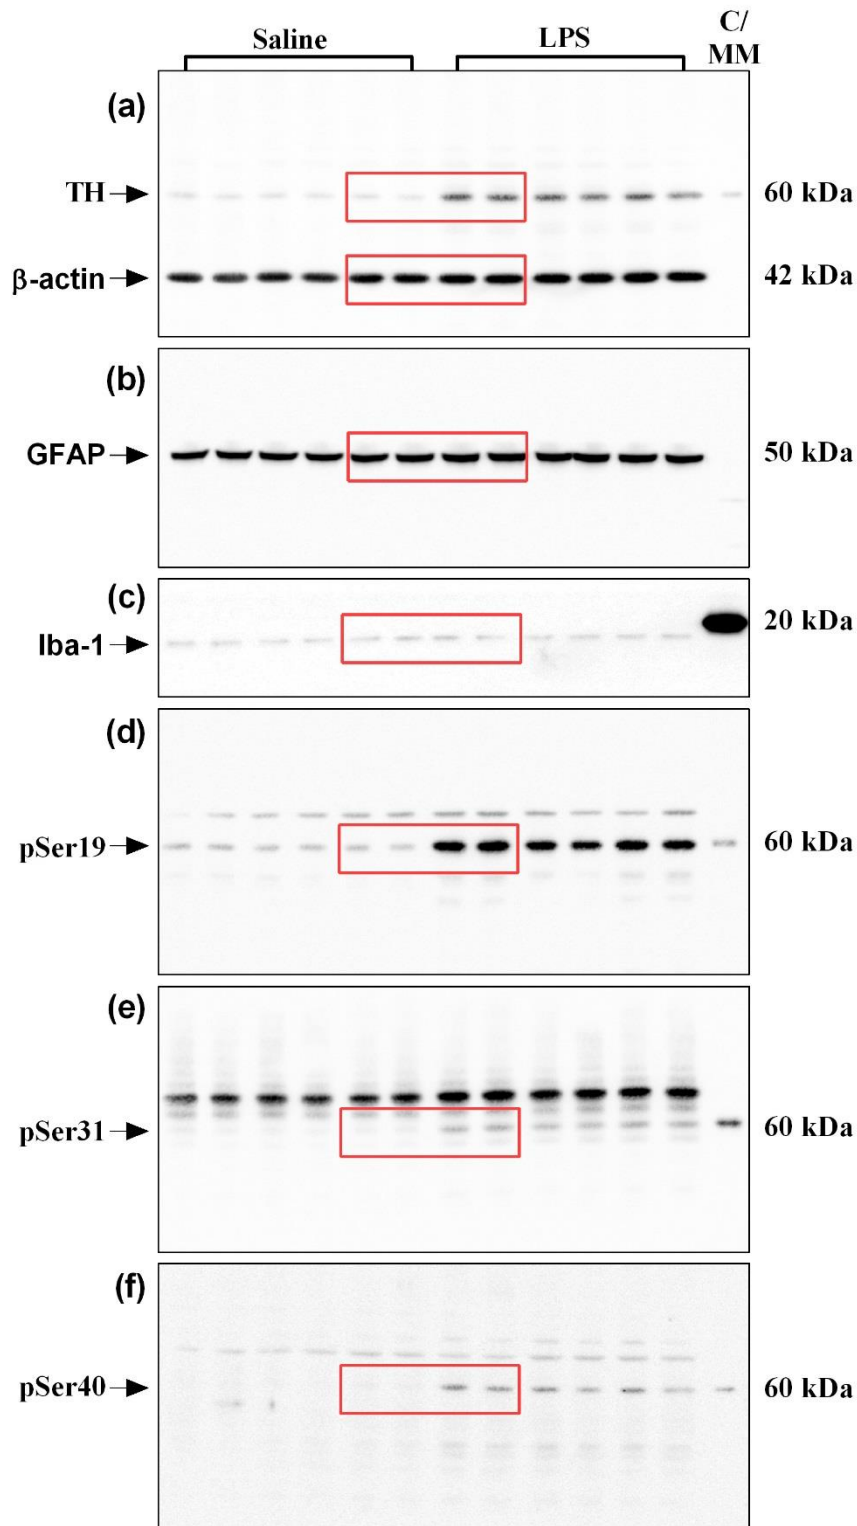

**Sup Fig. 3:** Full-length LC immunoblots probed with total-/phospho-TH, GFAP, Iba-1 or  $\beta$ -actin antibodies. MM, MagicMark™ XP Western Protein Standard; C, recombinant TH protein (specifically phosphorylated at Ser19, Ser31 or Ser40); red box, cropped images represented in Fig. 1 and Fig. 2.
